# Supplementary material
Source: PubMed Central journal article supplement (PMC5405429)
Supplement: PRO-26-1070-s001.pdf [file PRO-26-1070-s001.pdf]

# Bilayer Interferometry of Lipid Nanodisc Reconstituted Yeast Vacuolar H<sup>+</sup>-ATPase

Stuti Sharma and Stephan Wilkens\*

Department of Biochemistry and Molecular Biology, SUNY Upstate Medical University  
750 East Adams Street, Syracuse, New York 13210

\*To whom correspondence should be addressed: Stephan Wilkens, Department of Biochemistry and Molecular Biology, SUNY Upstate Medical University, 750 East Adams Street, Syracuse, NY 13210, Phone: 315-464-8703, Email: [wilkenss@upstate.edu](mailto:wilkenss@upstate.edu)

Supplementary Figures

Figure S1

Figure S2

Figure S1

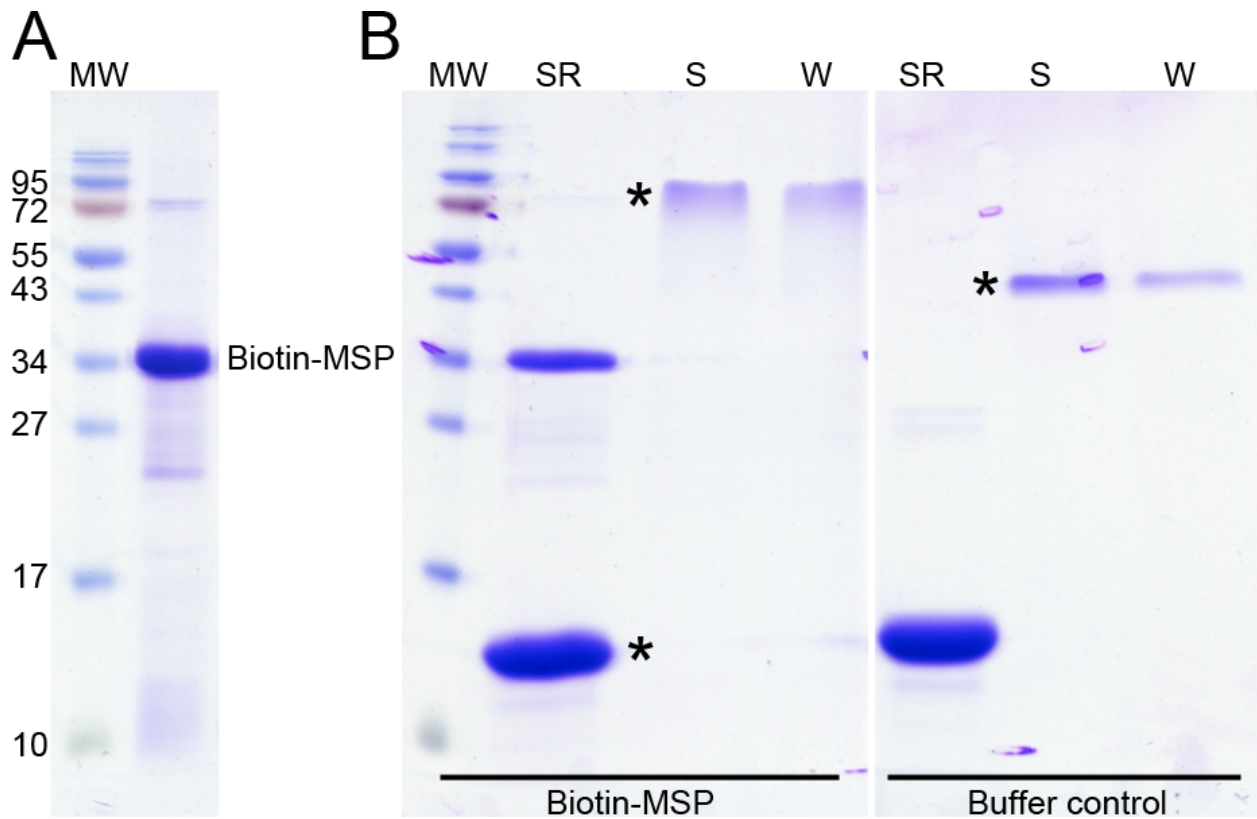

**Figure S1: Purification and characterization of biotinylated MSP.** (A) SDS-PAGE of purified biotinylated MSP. (B) Pull down assay using streptactin beads: SR denotes elution from the streptactin resin, S denotes supernatant and W denotes wash. Biotinylated MSP binds to streptactin beads irreversibly while negligible amounts of MSP appear in the supernatant or wash suggestive of almost complete biotinylation. A negative control using buffer is shown on the right gel. The bands labeled by the asterisks are due to streptactin.

Figure S2

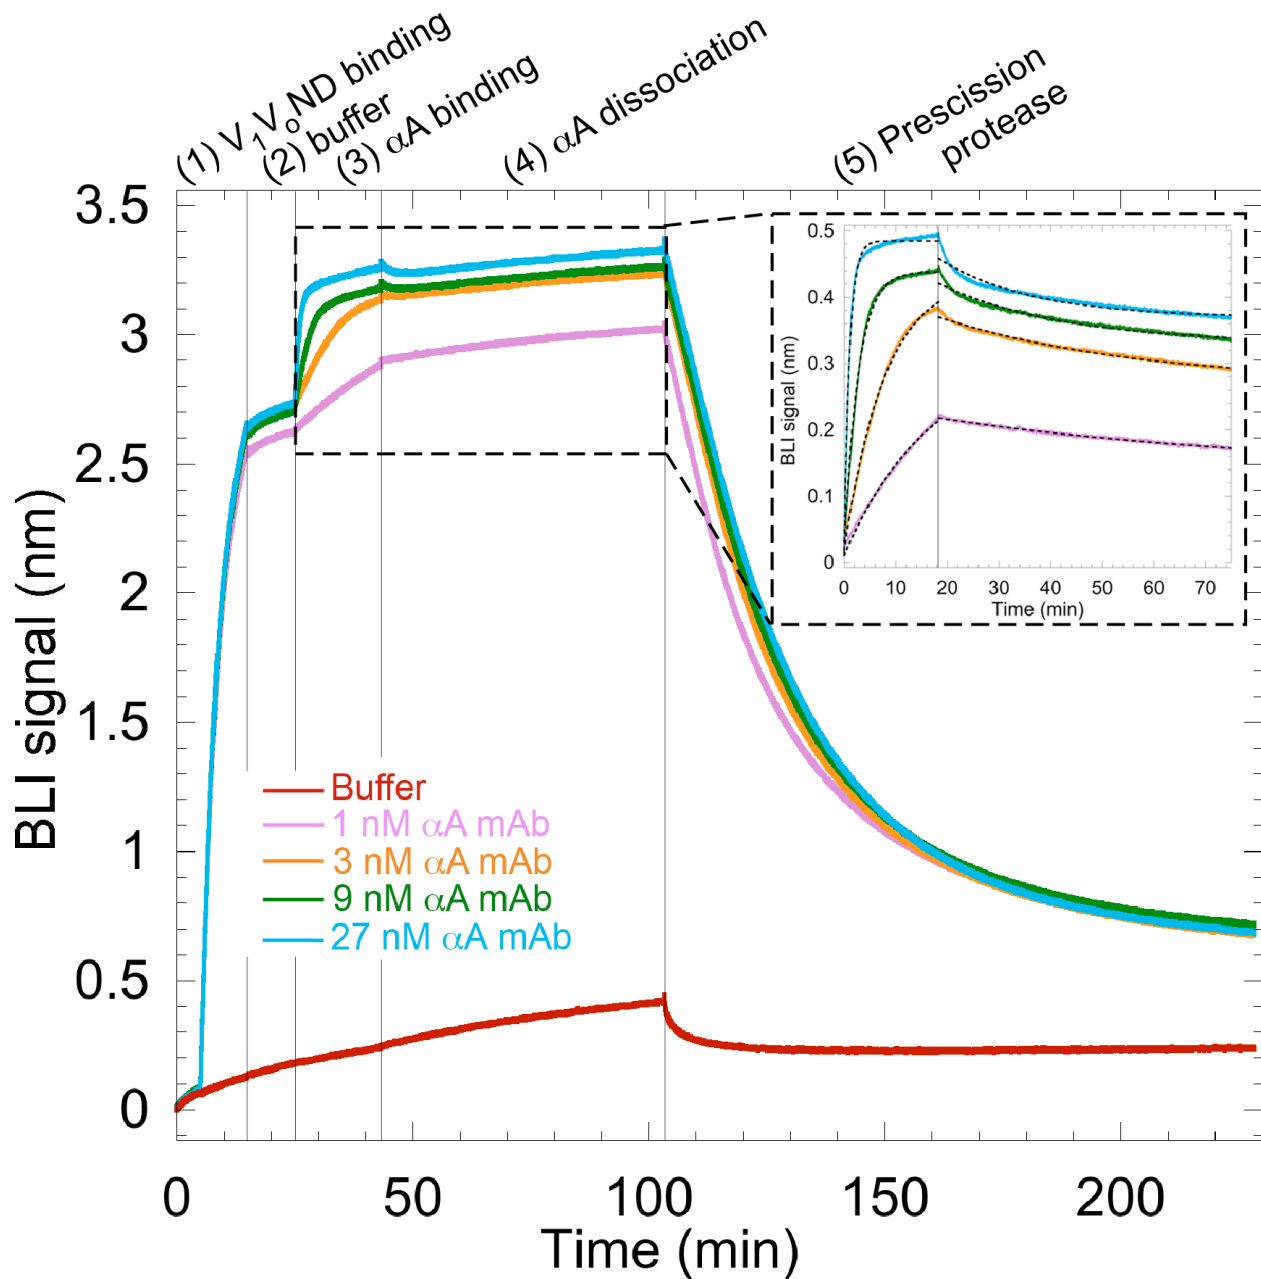

**Figure S2: Biolayer interferometry of V<sub>1</sub>V<sub>0</sub>ND with anti-subunit A mAb:** V<sub>1</sub>V<sub>0</sub>ND was immobilized at 5 μg/ml (step 1) and the BLI sensors were then dipped in wells containing buffer (step 2) followed by increasing concentrations (1, 3, 9, 27 nM) of a monoclonal antibody against subunit A (αA mAb; 8B1) to measure association rates (step 3). All the sensors were then dipped into wells containing buffer to measure dissociation rates (step 4). Sensors were then dipped into wells containing 0.2 U/μl of Precission protease (step 5). αA mAb showed concentration dependent binding to V<sub>1</sub>V<sub>0</sub>ND (enlarged box) as evident from the association and dissociation phases. The

signal obtained in buffer (red) was subtracted from the  $\alpha$ A mAb signal and the resultant curves were fitted to a local partial 1:1 binding model using the FortéBio data analysis software (black dotted traces). An observed on rate of  $\sim 6 \cdot 10^5 \pm 1.12 \times 10^{-5} \text{ s}^{-1}$  and off rate of  $5.7 \cdot 10^{-4} \pm 3.6 \times 10^{-6} \text{ s}^{-1}$  with a resultant  $K_d$  of  $\sim 0.9 \text{ nM}$  was obtained.  $K_d$ s in the high pM to low nM range have previously been reported for the interaction of Protein A with human IgG using BLI as described<sup>1</sup>. Representative experiment from two repeats is shown.

## Bibliography

1. Wilson, J.L., Scott, I.M. & McMurry, J.L. Optical biosensing: Kinetics of protein A-IgG binding using biolayer interferometry. *Biochem Mol Biol Educ* **38**, 400-7 (2010).
